# Supplementary material for: S100a9 deficiency accelerates MDS-associated tumor escape via PD-1/PD-L1 overexpression: S100a9 deficiency accelerates tumor escape
Source: PubMed Central journal article supplement (PMC10157523; doi:10.3724/abbs.2023015), 2023-02-21
Supplement: Supplementary.pdf [file Supplementary.pdf]

**Supplementary Table S1. The characteristics of patients enrolled in this study**

| Parameter                 | Number       |
|---------------------------|--------------|
| Sex                       |              |
| Male                      | 9            |
| Female                    | 8            |
| Median age, years (range) | 70 (35 – 79) |
| WHO classification        |              |
| RCUD                      | 1            |
| RARS                      | 1            |
| RCMD                      | 2            |
| RAEB-1                    | 6            |
| RAEB-2                    | 4            |
| IPSS-R                    |              |
| ≤3                        | 4            |
| ≥4.5                      | 10           |
| Karyotype                 |              |
| Normal                    | 13           |
| Complex                   | 4            |
